# Supplementary material for: Excited state processes of dinuclear Pt(ii) complexes bridged by 8-hydroxyquinoline
Source: Royal Society of Chemistry journal article supplement (doi:10.1039/d3dt00348e), 2023-01-01
Supplement: d3dt00348e1.pdf [file d3dt00348e1.pdf]

## Electronic Supporting Information for:

### Excited State Processes of Dinuclear Pt(II) Complexes Bridged by 8-hydroxyquinoline

Sarah Kromer, Subhangi Roy, James E. Yarnell, Chelsea M. Taliaferro and Felix N. Castellano\*

Department of Chemistry, North Carolina State University, Raleigh, NC 27695-8204

E-mail: fncastel@ncsu.edu

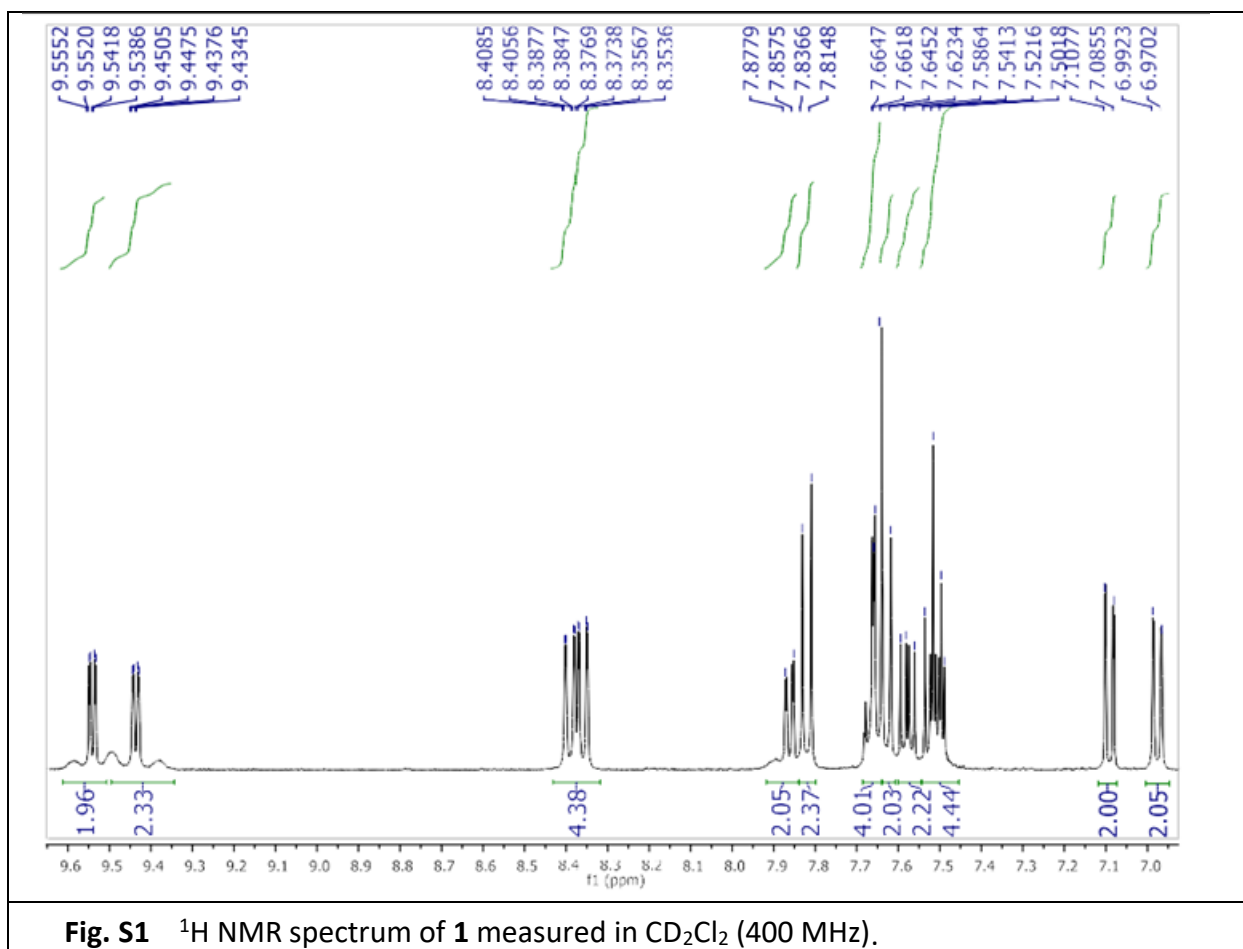

**Fig. S1** <sup>1</sup>H NMR spectrum of **1** measured in CD<sub>2</sub>Cl<sub>2</sub> (400 MHz).

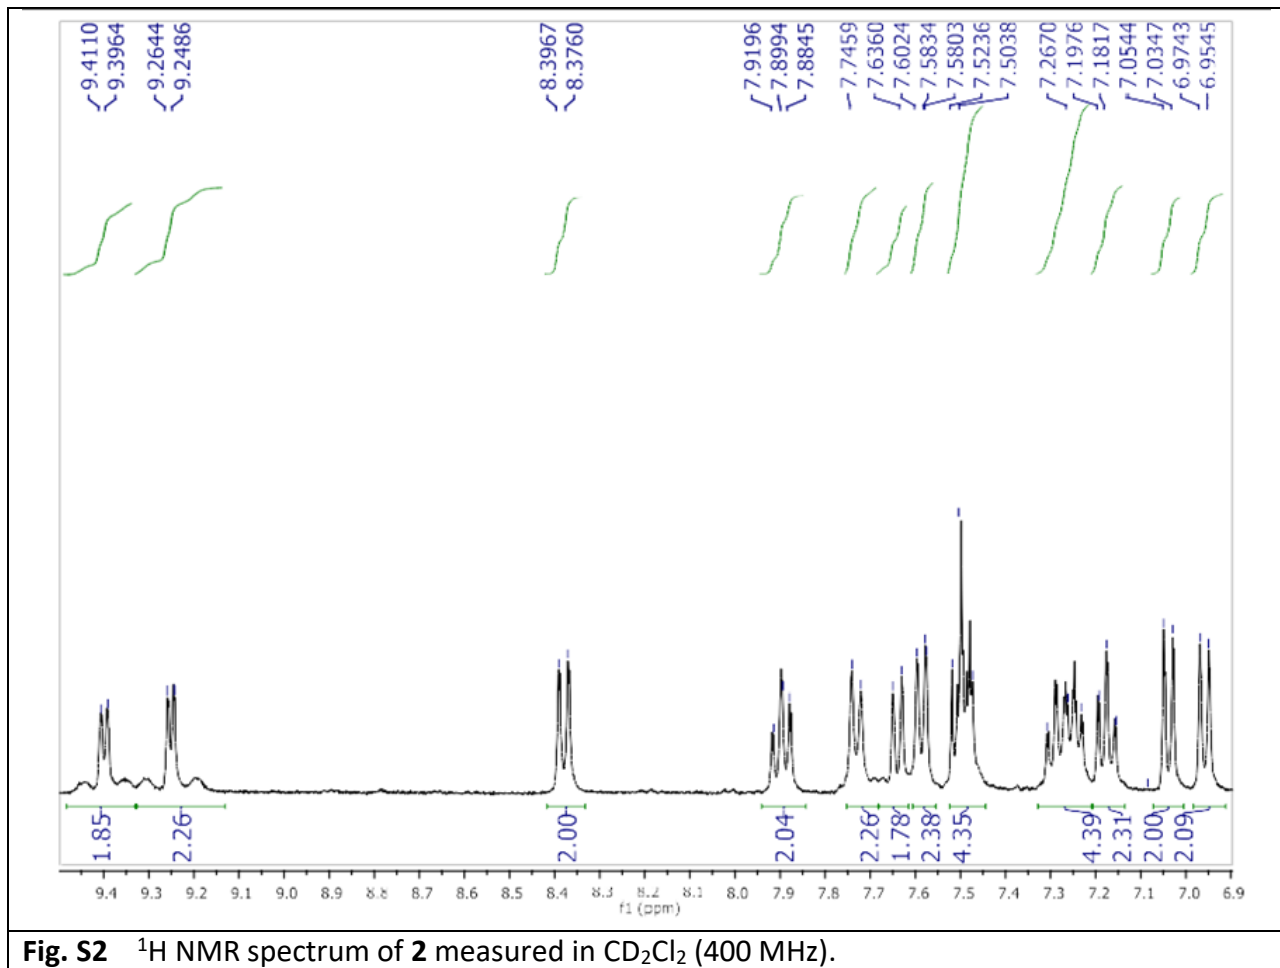

**Fig. S2** <sup>1</sup>H NMR spectrum of **2** measured in CD<sub>2</sub>Cl<sub>2</sub> (400 MHz).

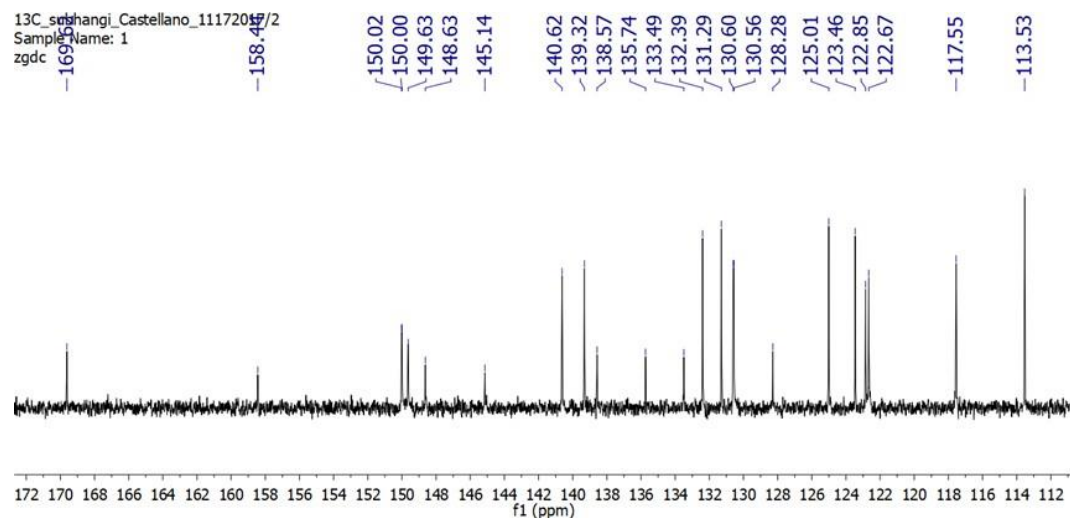

**Fig. S3**  $^{13}\text{C}$  NMR spectrum of **1** measured in  $\text{CD}_2\text{Cl}_2$  (100 MHz).

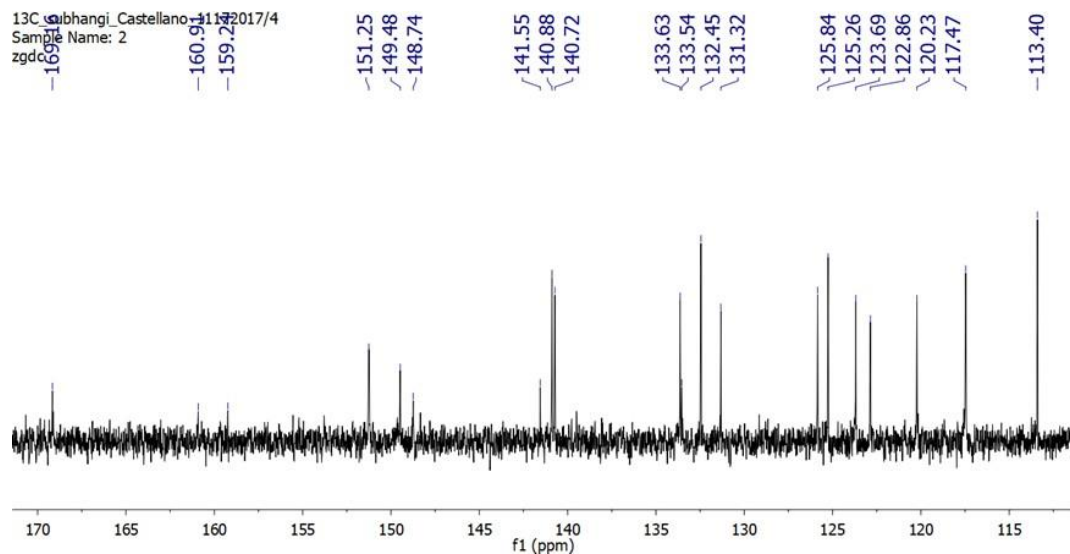

**Fig. S4**  $^{13}\text{C}$  NMR spectrum of **2** measured in  $\text{CD}_2\text{Cl}_2$  (100 MHz).

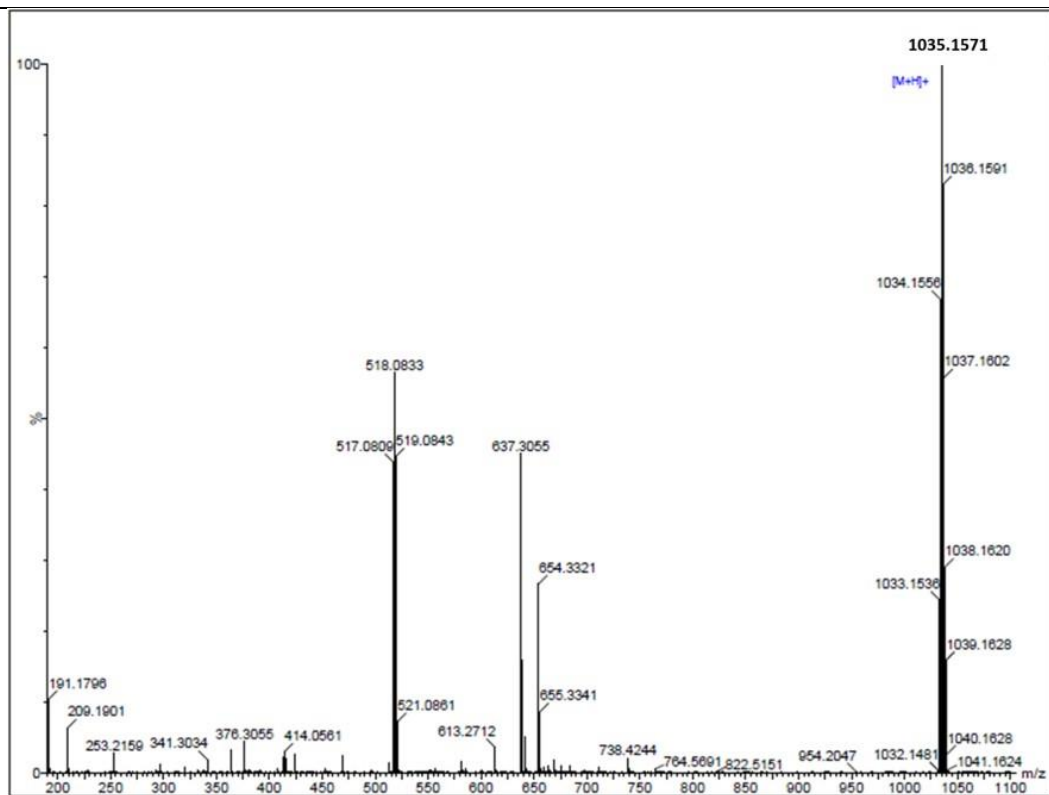

**Fig. S5** High resolution mass spectrum of **1**. The calculated mass for [M+H]<sup>+</sup> is 1035.1586.

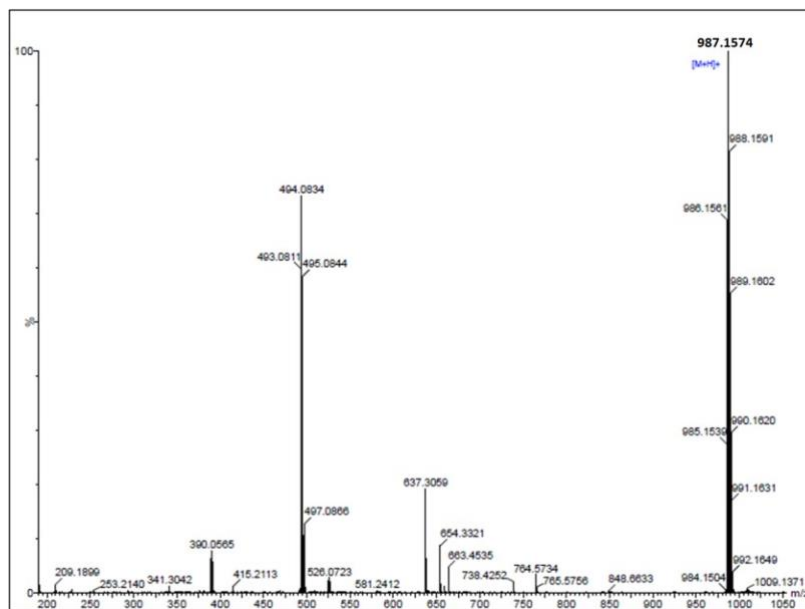

**Fig. S6** High resolution mass spectrum of **2**. The calculated mass for  $[M+H]^+$  is 987.1586.

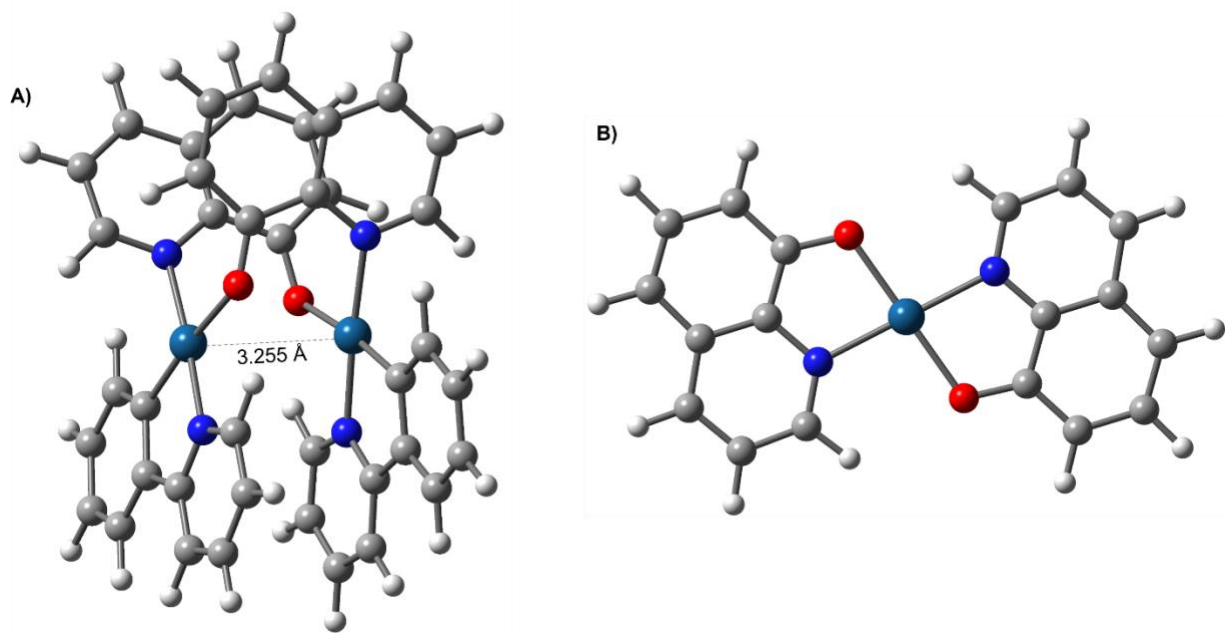

**Fig. S7** DFT optimized structures of **2** (a) and **3** (b), calculated at the PCM-PBE0-D3/Def2-SVP/SDD level of theory

**Table S1** Selected bond distances in Ångstroms as well as bond and dihedral angles in Degrees from DFT optimized structures of **1** and **2**, where bridging nitrogens denoted (B) and cyclometalating (C). Calculated at the PCM-PBE0-D3/Def2-SVP/SDD level of theory.

|              | <b>1</b> | <b>2</b> |
|--------------|----------|----------|
| Pt-Pt        | 3.243    | 3.255    |
| Pt-N (B)     | 2.061    | 2.066    |
| Pt-N (C)     | 2.023    | 2.012    |
| Pt-O         | 2.142    | 2.151    |
| N(B)-Pt-N(C) | 176.9    | 176.2    |
| N-Pt-Pt-N    | 50.312   | 48.345   |

**Table S2** Selected bond distances in Ångstroms and bond angles in degrees from the DFT optimized structure of **3** in comparison with values from the reported crystal structure.<sup>1</sup>

|        | <b>3</b> | <b>Crystal Structure</b> |
|--------|----------|--------------------------|
| Pt-N   | 2.01     | 1.993                    |
| Pt-O   | 2.018    | 2.014                    |
| N-Pt-N | 180      | 180                      |
| O-Pt-O | 180      | 180                      |

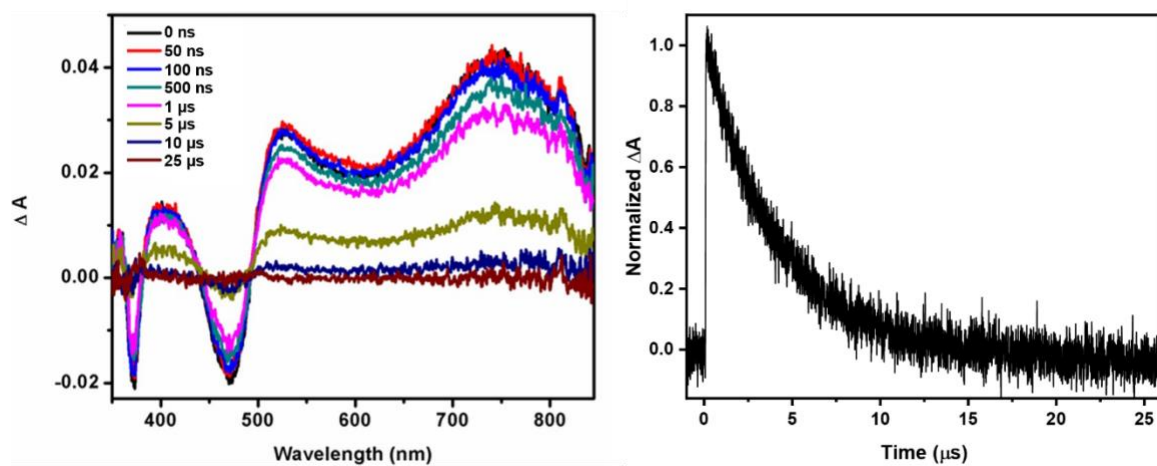

**Fig. S8** Excited state absorption difference spectra of [Pt(ppy)( $\mu$ -8HQ)]<sub>2</sub> (**2**) in THF with 490 nm pulsed excitation (2 mJ/pulse, 7 nm fwhm). The sample was deaerated for 30 minutes with bubble-degassing. (B) Single exponential kinetic fit for the decay profile at 530 nm.

---

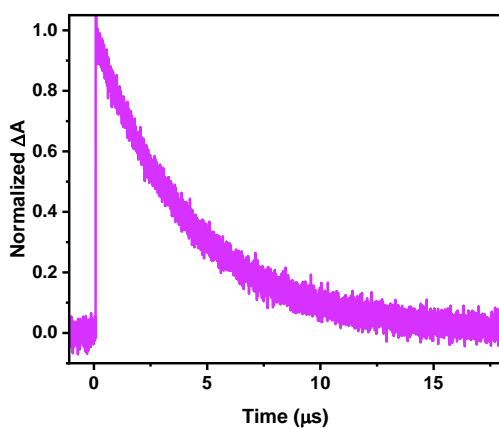

**Fig. S9** Single exponential emission decay of [Pt(ppy)( $\mu$ -8HQ)]<sub>2</sub> (**2**) in THF with 500 nm pulsed excitation (2 mJ/pulse, 7 nm fwhm). The sample was prepared in an air-free glove box under N<sub>2</sub>.

---

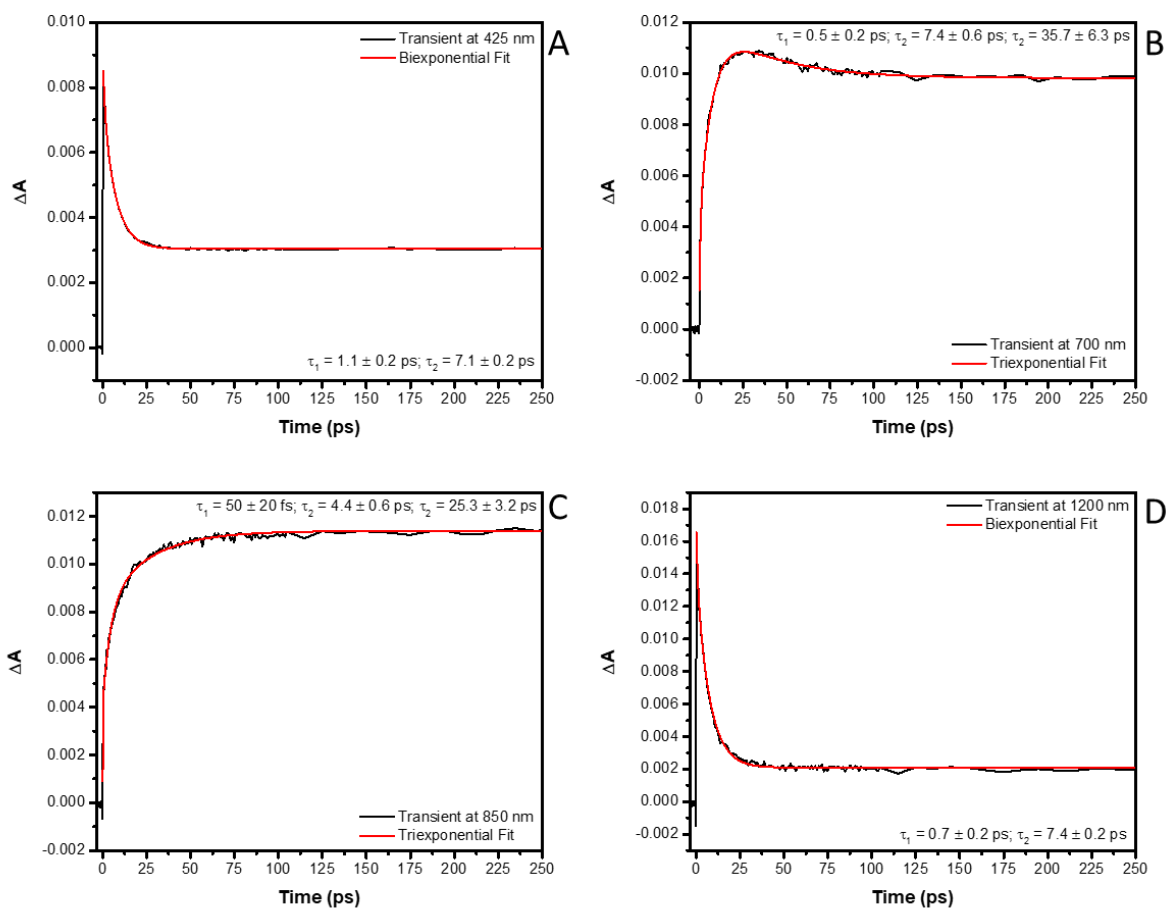

**Fig. S10** Ultrafast kinetic analysis of  $[\text{Pt}(\text{bzq})(\mu\text{-8HQ})]_2$  (**1**) at 425 nm (A), 700 nm (B), 850 nm (C), and 1200 nm (D) in THF with 500 nm pulsed laser excitation (100 fs fwhm).



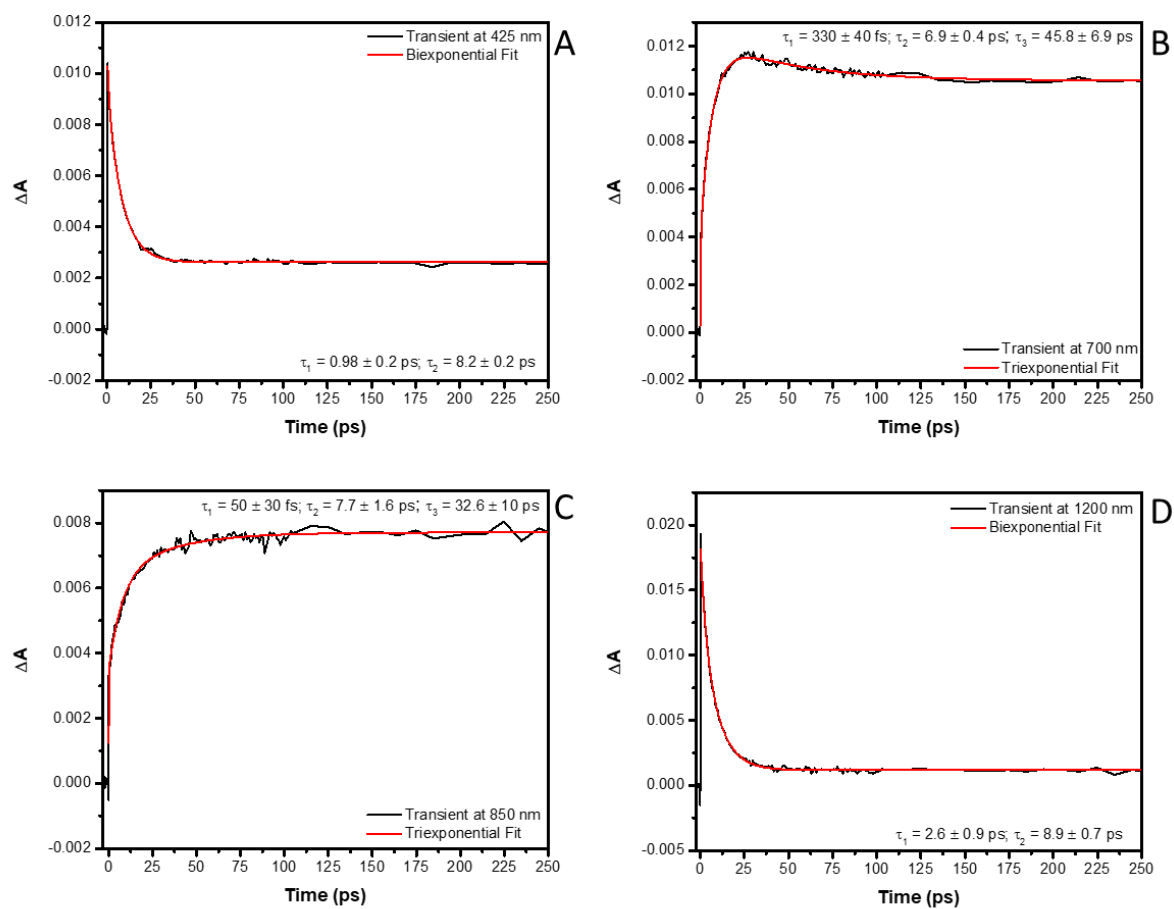

**Fig. S11** Ultrafast kinetic analysis of  $[Pt(ppy)(\mu-8HQ)]_2$  (**2**) at 425 nm (A), 700 nm (B), 850 nm (C), and 1200 nm (D) in THF with 500 nm pulsed excitation (100 fs fwhm).

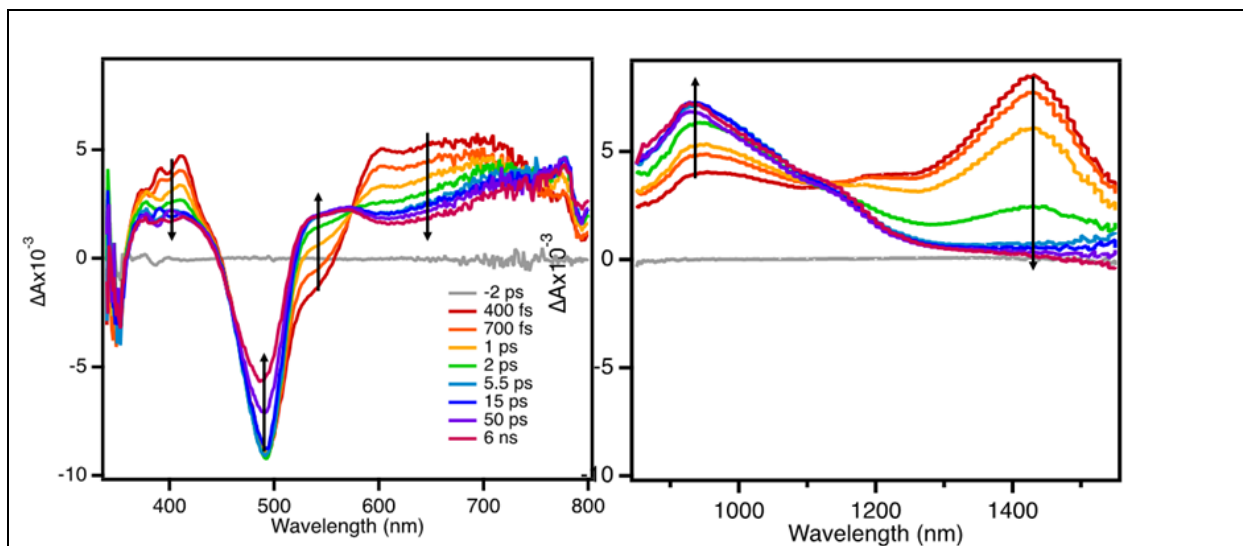

**Fig. S12** Ultrafast difference spectra of Pt(8-HQ)<sub>2</sub> after photoexcitation at 500 nm in THF (100 fs fwhm).

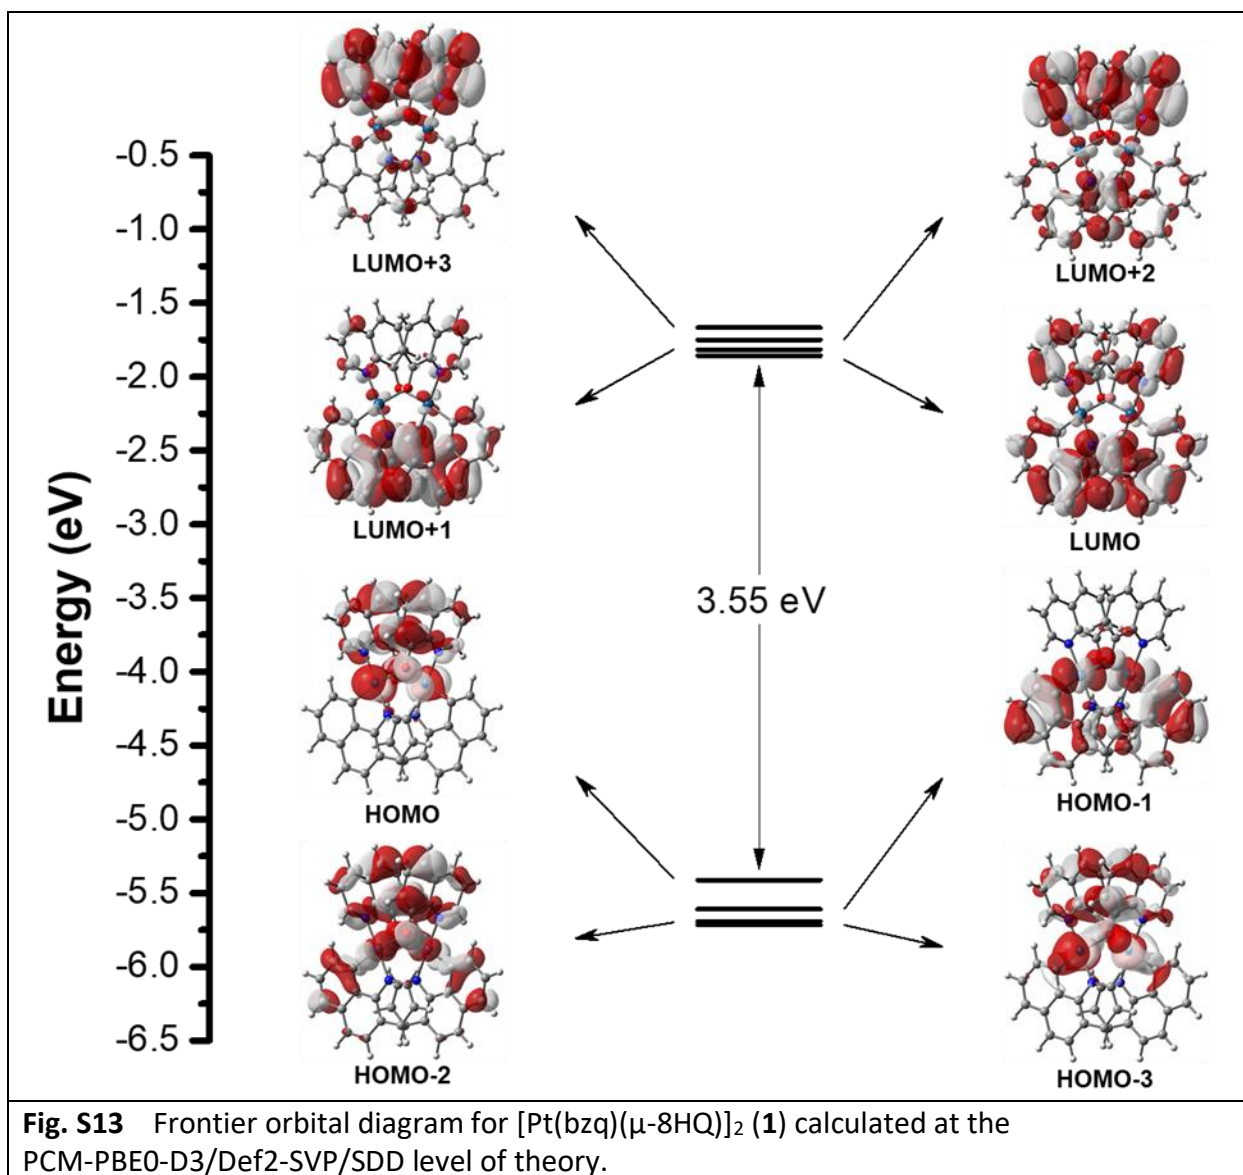

**Fig. S13** Frontier orbital diagram for  $[\text{Pt}(\text{bzq})(\mu\text{-8HQ})]_2$  (**1**) calculated at the PCM-PBE0-D3/Def2-SVP/SDD level of theory.

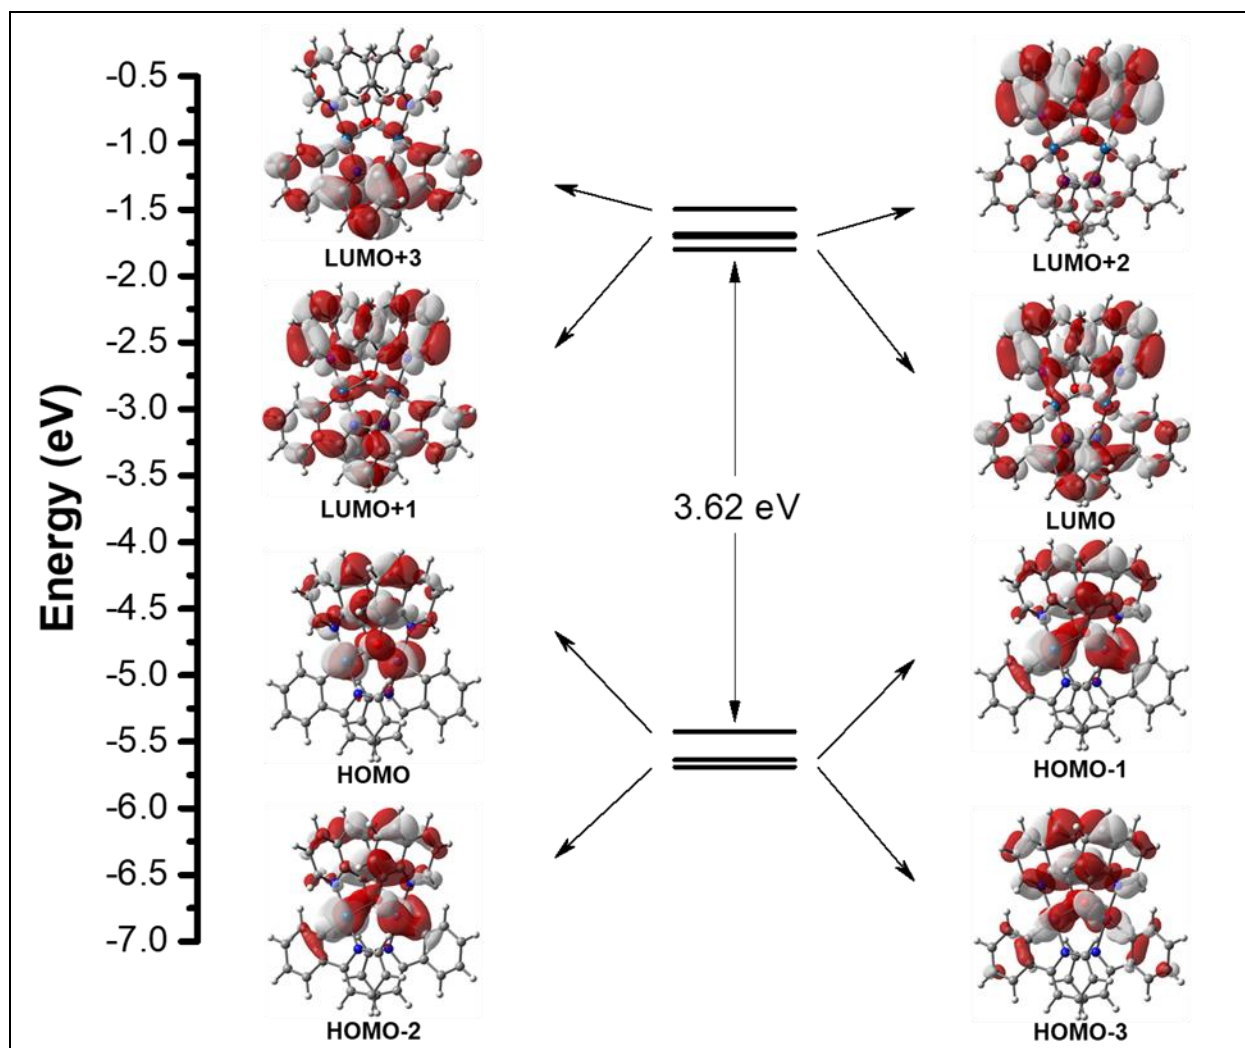

**Fig. S14** Frontier orbital diagram for  $[\text{Pt}(\text{ppy})(\mu\text{-8HQ})]_2$  (**2**) calculated at the PCM-PBE0-D3/Def2-SVP/SDD level of theory.

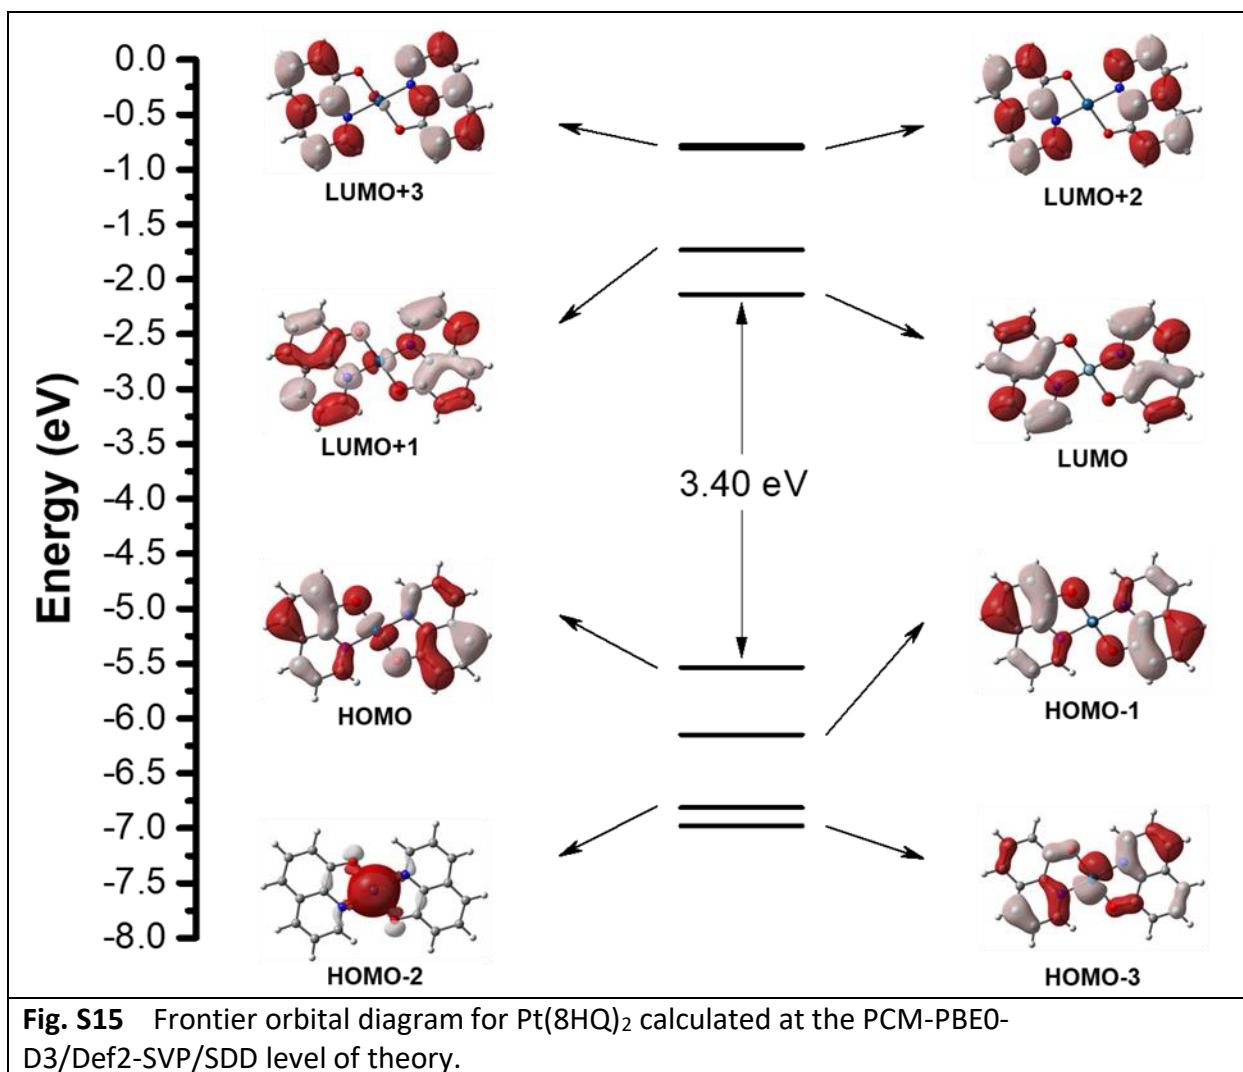

**Fig. S15** Frontier orbital diagram for Pt(8HQ)<sub>2</sub> calculated at the PCM-PBE0-D3/Def2-SVP/SDD level of theory.

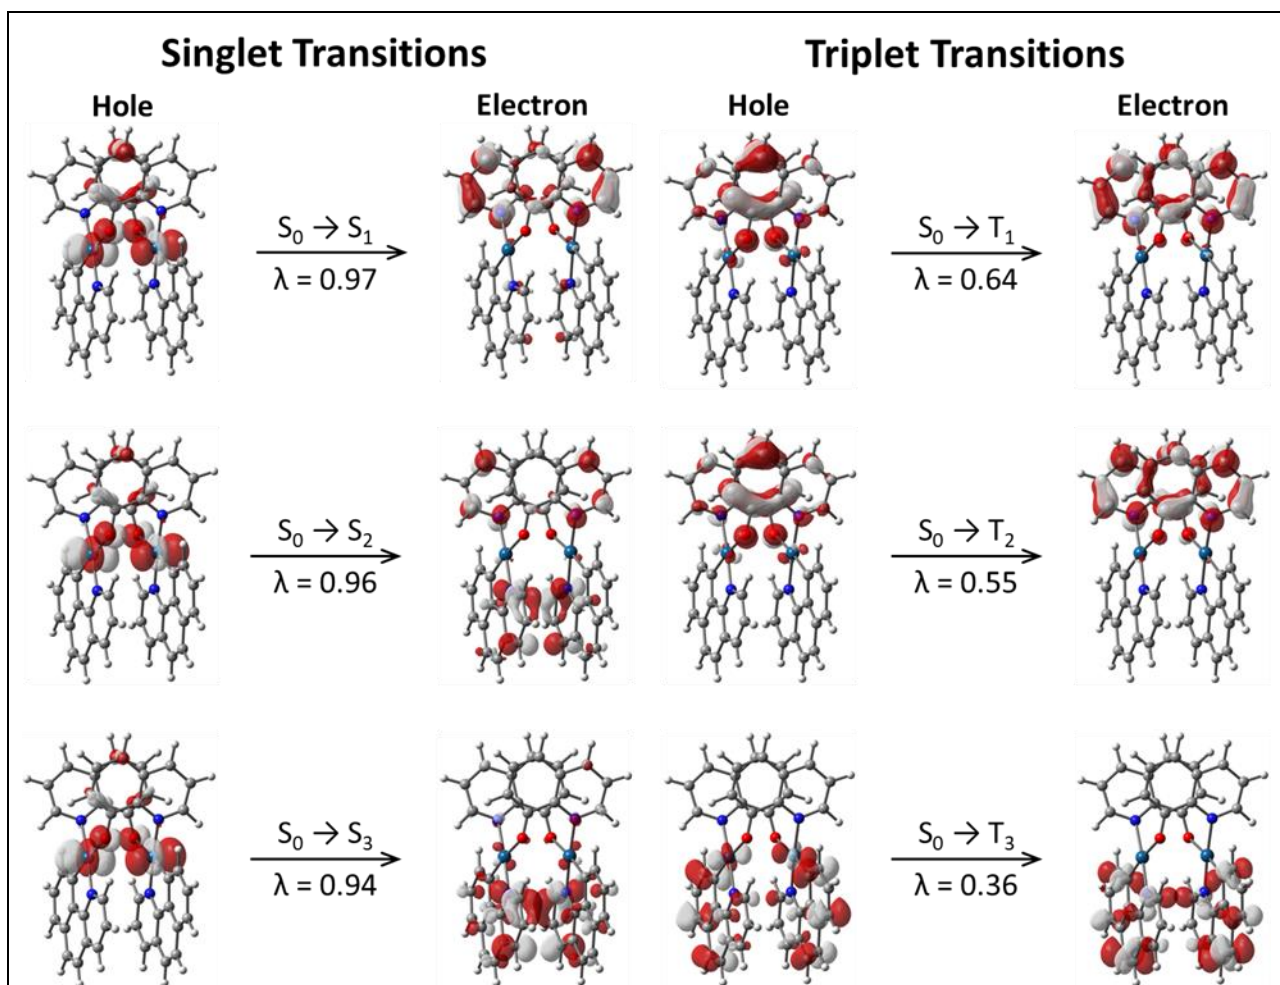

**Fig. S16** Natural transition orbitals for [Pt(bzq)(μ-8HQ)]<sub>2</sub> (**1**) calculated at the PCM-PBE0-D3/Def2-SVP/SDD level of theory.



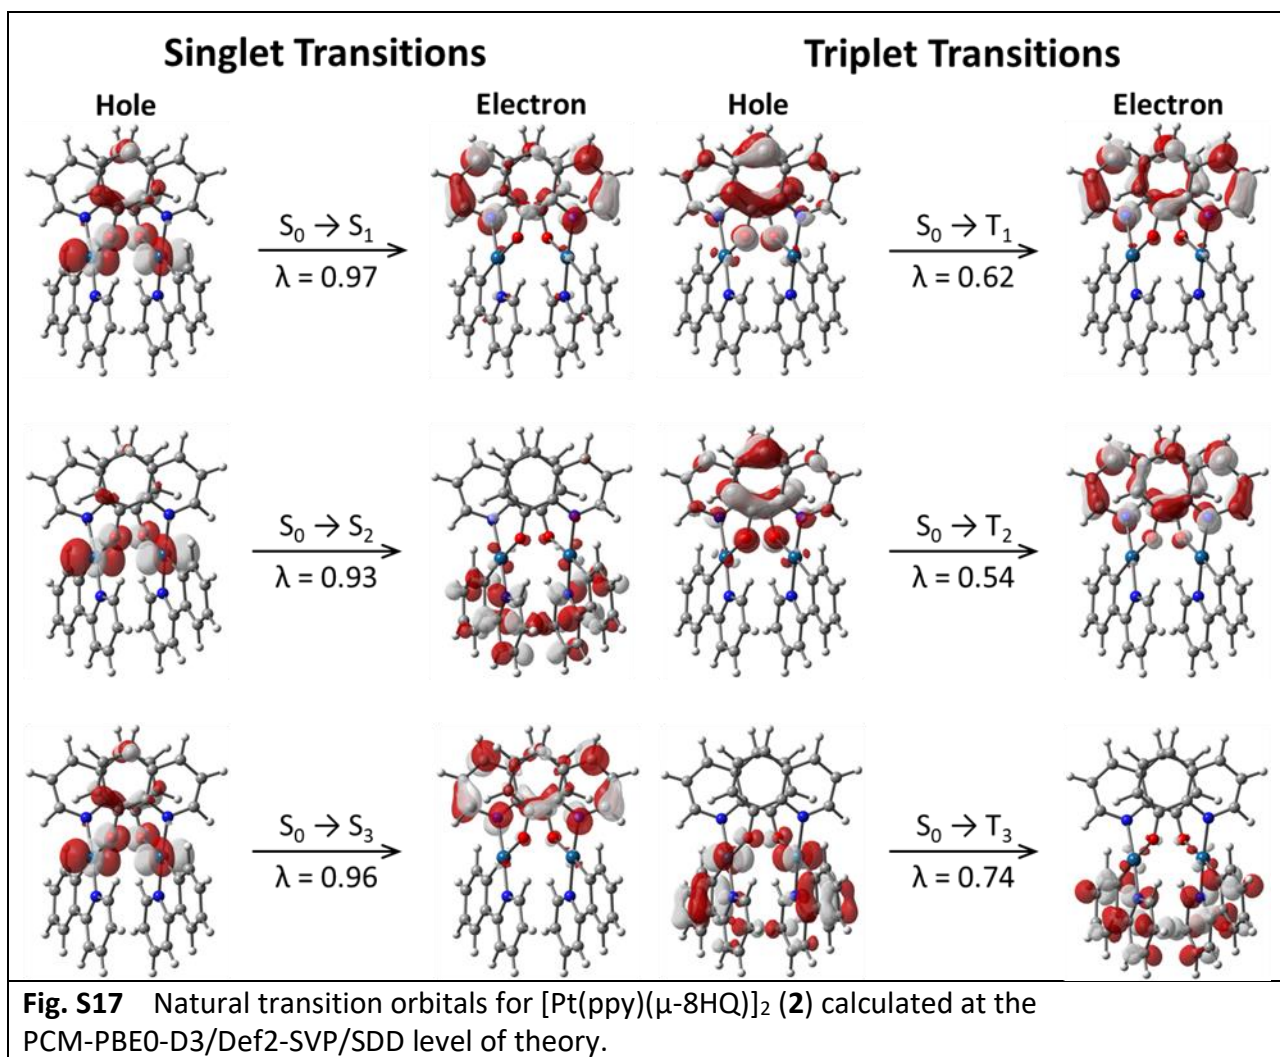

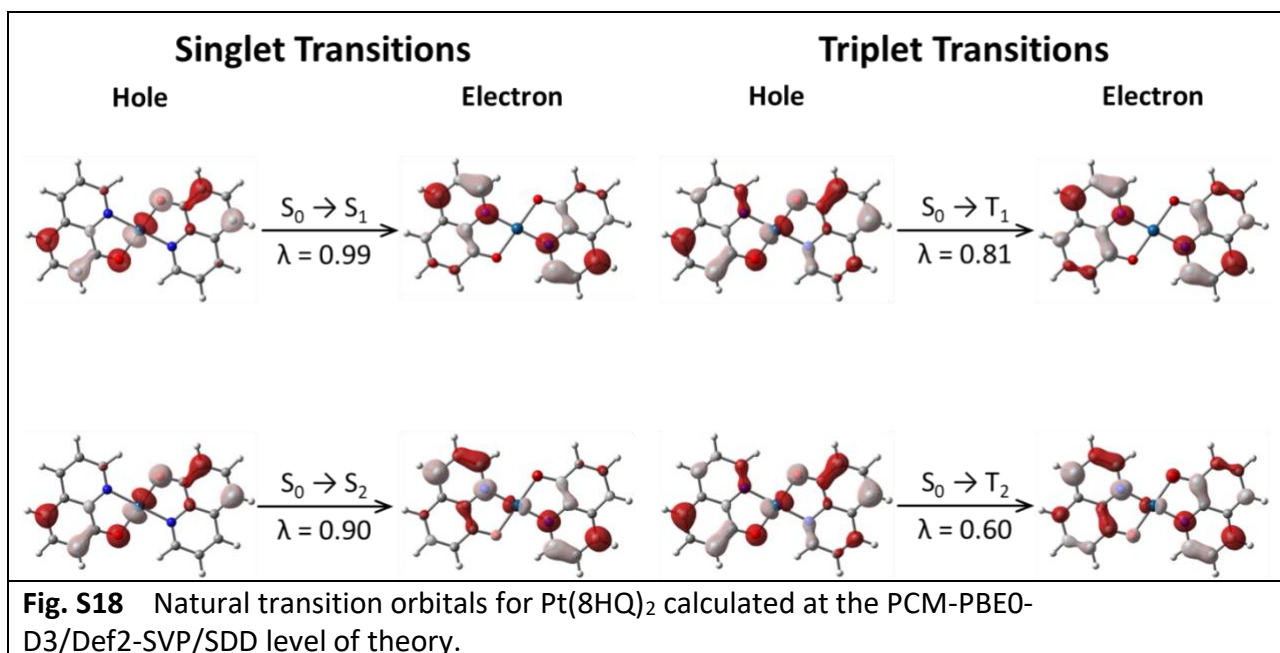

## References

- (1) M. Kato, Y. Ogawa, M. Kozakai and Y. Sugimoto, *Acta. Cryst.*, 2002, **C58**, m147-m149
